# Supplementary material
Source: Research Square preprint supplement (doi:10.21203/rs.3.rs-8371651/v1)
Supplement: Supplementary file 1 [file 353895c38d9a2718a58b0e8b.docx]

**Supplementary Table 1.** Evaluation of clustering results using six methods with 20% and 50% missing data under two covariance scenarios across 100 simulations (4 clusters, sample size 1000)

| Method | m | %Missing |  | Scenario 1 (larger variances) | | | |  | Scenario 2 (smaller variances) | | | | |
| --- | --- | --- | --- | --- | --- | --- | --- | --- | --- | --- | --- | --- | --- |
|  |  |  |  | PCCN | ARI | NMI | PA |  | PCCN | ARI | NMI | PA |
| CCA | - | 0% |  | 96% | 0.984 | 0.972 | 0.993 |  | 79% | 0.995 | 0.989 | 0.998 |
| - | 20% |  | 73% | 0.979 | 0.965 | 0.954 |  | 79% | 0.993 | 0.986 | 0.960 |
| - | 50% |  | 48% | 0.978 | 0.962 | 0.712 |  | 53% | 0.993 | 0.987 | 0.699 |
| K-POD | - | 20% |  | - | 0.932 | 0.925 | 0.941 |  | - | 0.917 | 0.922 | 0.902 |
| - | 50% |  | - | 0.935 | 0.926 | 0.950 |  | - | 0.942 | 0.941 | 0.951 |
| MICA | 20 | 20% |  | 90% | 0.983 | 0.970 | 0.993 |  | 68% | 0.994 | 0.989 | 0.998 |
| 50% |  | 84% | 0.981 | 0.968 | 0.992 |  | 62% | 0.994 | 0.987 | 0.997 |
| 50 | 20% |  | 88% | 0.983 | 0.970 | 0.993 |  | 68% | 0.995 | 0.989 | 0.998 |
| 50% |  | 82% | 0.981 | 0.968 | 0.992 |  | 58% | 0.994 | 0.988 | 0.998 |
| F.MICA | 20 | 20% |  | 0% | - | - | - |  | 94% | 0.991 | 0.985 | 0.993 |
| 50% |  | 0% | - | - | - |  | 98% | 0.991 | 0.984 | 0.995 |
| 50 | 20% |  | 0% | - | - | - |  | 94% | 0.994 | 0.988 | 0.998 |
| 50% |  | 0% | - | - | - |  | 97% | 0.994 | 0.987 | 0.997 |
| StackMI | 20 | 20% |  | 94% | 0.002 | 0.000 | 0.325 |  | 80% | 0.002 | 0.000 | 0.325 |
| 50% |  | 90% | 0.002 | 0.000 | 0.325 |  | 71% | 0.002 | 0.000 | 0.325 |
| 50 | 20% |  | 93% | 0.000 | 0.000 | 0.330 |  | 82% | 0.002 | 0.000 | 0.325 |
| 50% |  | 89% | 0.000 | 0.000 | 0.330 |  | 72% | 0.002 | 0.000 | 0.325 |
| ClusterMI | 20 | 20% |  | 100% | 0.983 | 0.972 | 0.993 |  | 100% | 0.994 | 0.988 | 0.997 |
| 50% |  | 100% | 0.983 | 0.972 | 0.993 |  | 100% | 0.994 | 0.988 | 0.997 |
| 50 | 20% |  | 100% | 0.983 | 0.972 | 0.993 |  | 100% | 0.994 | 0.988 | 0.997 |
| 50% |  | 100% | 0.984 | 0.972 | 0.993 |  | 100% | 0.994 | 0.988 | 0.997 |

PCCN: percentage of correct cluster number identified across 100 simulations. m: imputation number. ARI: adjusted rand index. NMI: normalized mutual. PA: percentage agreement. CCA: complete case analysis. MICA: multiple imputation clustering analysis. F.MICA: a framework for multiple imputation in cluster analysis. StackMI: stacked multiple imputation. clusterMI: cluster multiple imputation.

**Supplementary Table 2.** Summary of charactersitics of women in each micronutrient cluster derived by six methods (JiVitA-3 Trial)

| Method | Cluster Label | N | Maternal Age (years) |  | Socioeconomic Status (%) | | |  | Maternal Education Level (%) | | | |
| --- | --- | --- | --- | --- | --- | --- | --- | --- | --- | --- | --- | --- |
| Low | Median | High | 1 | 2 | 3 | 4 |
| CCA | 1 | 376 | 21 (18-25) |  | 32.18 | 39.1 | 28.72 |  | 31.38 | 63.03 | 2.39 | 3.19 |
| 2 | 948 | 20 (18-25) |  | 41.46 | 39.87 | 18.67 |  | 29.11 | 63.92 | 4.75 | 2.22 |
| K-POD | 1 | 398 | 21 (18-25) |  | 32.91 | 37.19 | 29.9 |  | 32.24 | 62.47 | 2.27 | 3.02 |
| 2 | 1298 | 20 (18-25) |  | 41.51 | 39.27 | 19.21 |  | 30.45 | 63.45 | 3.94 | 2.16 |
| MICA | 1 | 431 | 21 (18-25) |  | 31.55 | 38.05 | 30.39 |  | 33.26 | 60.93 | 2.09 | 3.72 |
| 2 | 1265 | 20 (18-25) |  | 42.2 | 39.03 | 18.76 |  | 30.06 | 64.00 | 4.04 | 1.90 |
| ClusterMI | 1 | 452 | 21 (18-25) |  | 32.74 | 37.83 | 29.42 |  | 32.82 | 61.86 | 2.00 | 3.33 |
| 2 | 1244 | 20 (18-25) |  | 41.95 | 39.13 | 18.92 |  | 30.16 | 63.71 | 4.11 | 2.02 |
| StackMI | 1 | 76 | 22 (19-26) |  | 26.32 | 46.05 | 27.63 |  | 27.63 | 64.47 | 3.95 | 3.95 |
| 2 | 1620 | 20 (18-25) |  | 40.11 | 38.44 | 21.45 |  | 31.02 | 63.16 | 3.53 | 2.29 |
| F.MICA | 1 | 426 | 21 (18-25) |  | 33.1 | 37.79 | 29.11 |  | 33.18 | 61.88 | 2.12 | 2.82 |
| 2 | 1270 | 20 (18-25) |  | 41.64 | 39.12 | 19.24 |  | 30.09 | 63.67 | 4.03 | 2.21 |

Median and lower and upper quartiles of maternal age are shown. Maternal education level: 1=None; 2=Primary (some/completed: middle school/junior high school); 3=Secondary (some/completed: senior high school); 4=University/Trade (some/completed: university/polytechnics/vocational school).

**Supplementary Table 3.** Percentages of women with micronutrient deficiency and inflammation in each micronutrient cluster derived by six methods (JiVitA-3 Trial)

| Method | Cluster Label | Iron Deficiency (%) | Folate Deficiency (%) | Vitamin A Deficiency (%) | Vitamin B12 Deficiency (%) | Vitamin D Deficiency (%) | Zinc Deficiency (%) | Inflammation (%) |
| --- | --- | --- | --- | --- | --- | --- | --- | --- |
| CCA | 1 | 1.3 | 0.3 | 3.7 | 8.8 | 4.3 | 25.5 | 15.2 |
| 2 | 6.3 | 3.5 | 8.3 | 43.1 | 8.3 | 54.6 | 15.7 |
| K-POD | 1 | 1.6 | 0.3 | 3.2 | 8.5 | 4.3 | 24.3 | 17.3 |
| 2 | 5.9 | 3.3 | 8.7 | 42.7 | 7.5 | 53.6 | 15.9 |
| MICA | 1 | 1.5 | 0.2 | 3.0 | 9.3 | 4.1 | 24.3 | 16.7 |
| 2 | 6.0 | 3.4 | 8.9 | 43.1 | 7.7 | 54.2 | 16.1 |
| ClusterMI | 1 | 1.4 | 0.2 | 3.3 | 9.0 | 3.9 | 25.6 | 15.8 |
| 2 | 6.1 | 3.5 | 8.8 | 43.7 | 7.8 | 54.2 | 16.5 |
| StackMI | 1 | 4.3 | 4.3 | 5.6 | 29.2 | 4.3 | 40.6 | 17.4 |
| 2 | 4.8 | 2.4 | 7.4 | 33.8 | 6.8 | 46.1 | 16.2 |
| F.MICA | 1 | 1.5 | 0.2 | 3.2 | 9.1 | 4.1 | 24.1 | 17.1 |
| 2 | 6.0 | 3.4 | 8.8 | 43.0 | 7.7 | 54.2 | 16.0 |

Cut-off values used to define deficiency in plasma biomarkers: adjusted ferritin < 15 µg/L (iron deficiency); folate < 6.8 nmol/L; serum retinol < 0.70 µmol/L (vitamin A deficiency); vitamin B₁₂ < 148 pmol/L; 25-hydroxyvitamin D < 30 nmol/L; zinc < 700 µg/L; inflammation defined as α-1-acid glycoprotein (AGP) > 1.0 g/L.

**Supplementary Table 4.** Median micronutrient biomarker concentrations (lower quartile, upper quartile) for each cluster derived by complete case analysis (CCA), k-POD, multiple imputation cluster analysis (MICA) using JiVitA-3 trial data

| Method | CCA | CCA | k-POD | k-POD | MICA | MICA |
| --- | --- | --- | --- | --- | --- | --- |
| Cluster | 1 | 2 | 1 | 2 | 1 | 2 |
| N | 376 | 948 | 398 | 1298 | 431 | 1265 |
| Ferritin, | 78.79  (52.47, 124.92) | 48.75  (30.92, 71.85) | 80.28  (52.64, 126.91) | 50.7  (31.67, 72.88) | 77.56  (51.33, 126.3) | 50.68  (31.48, 73.19) |
| Folate,  m | 21.33  (16.86, 27.41) | 14.84  (11.26, 18.79) | 22.09  (17.07, 28.78) | 15.02  (11.44, 19.13) | 22.03  (17.07, 28.53) | 14.9  (11.39, 18.91) |
| Retinol, | 1.15  (0.95, 1.36) | 1.04  (0.86, 1.23) | 1.14  (0.95, 1.36) | 1.04  (0.86, 1.24) | 1.15  (0.96, 1.36) | 1.04  (0.86, 1.23) |
| Vitamin B12, | 284.05  (202.89, 383.25) | 159.93  (124.25, 198.93) | 287.03  (202.9, 388.44) | 160.1  (124.27, 200.87) | 283.72  (202.81, 384.08) | 159.36  (124.1, 199.02) |
| 25-Hydroxyvitamin D, | 47.44  (40.44, 55.34) | 43.77  (36.88, 52.45) | 47.34  (40.28, 55.9) | 44.61  (37.42, 53.08) | 47.55  (40.49, 55.96) | 44.32  (37.28, 52.92) |
| Zinc, | 779.93  (696.52, 923.2) | 685.29  (616.44, 778.77) | 788.82  (702.03, 941.41) | 686.86  (618.82, 779.18) | 784.61  (702.29, 937.24) | 685.62  (618.64, 778.94) |
| AGP, | 0.72  (0.57, 0.88) | 0.72  (0.56, 0.89) | 0.72  (0.58, 0.9) | 0.72  (0.56–0.9) | 0.72  (0.58, 0.9) | 0.72  (0.56, 0.9) |

Ferritin was adjusted for alpha(1)-acid glycoprotein (AGP) by the BRINDA method.

**Supplementary Table 5.** Median micronutrient biomarker concentrations (lower quartile, upper quartile) for each cluster derived by cluster multiple imputation (clusterMI), stacked multiple imputation (stackMI), and a framework for multiple imputation in cluster analysis (F.MICA) using the JiVitA-3 data

| Method | ClusterMI | ClusterMI | stackMI | stackMI | F.MICA | F.MICA |
| --- | --- | --- | --- | --- | --- | --- |
| Cluster | 1 | 2 | 1 | 2 | 1 | 2 |
| N | 452 | 1244 | 76 | 1620 | 426 | 1270 |
| Ferritin, | 77.72  (52.68, 125.5) | 50.03  (31.14, 72.05) | 54.09  (33.15, 89.89) | 56.52  (35.25, 83.07) | 78.06  (51.25, 126.35) | 50.7  (31.53, 73.13) |
| Folate, m | 21.68  (17.06, 28.1) | 14.82  (11.34, 18.78) | 15.81  (12.15, 21.14) | 16.56  (12.29, 21.55) | 21.67  (17.06, 28.53) | 14.94  (11.4, 19.06) |
| Retinol, | 1.15  (0.96, 1.36) | 1.03  (0.86, 1.23) | 1.09  (0.86, 1.34) | 1.06  (0.88, 1.26) | 1.16  (0.95, 1.37) | 1.04  (0.86, 1.23) |
| Vitamin B12, | 276.62  (201.93, 381.81) | 158.63  (123.68, 198.14) | 170.43  (141.04, 252.96) | 176.31  (133.35, 242.63) | 286.48  (202.87, 384.39) | 159.71  (124.13, 199.22) |
| 25-Hydroxyvitamin D, | 47.75  (40.53, 56.14) | 44.22  (37.15, 52.72) | 45.17  (38.39, 51.69) | 45.28  (38.28, 53.98) | 47.72  (40.49, 55.98) | 44.32  (37.29, 52.9) |
| Zinc, | 780.65  (695.88, 929.35) | 686.14  (618.56, 779.02) | 741.7  (628.1, 828.37) | 713.27  (632.09, 824.58) | 787.91  (703.07, 938.79) | 685.69  (618.66, 778.17) |
| AGP, | 0.72  (0.58, 0.89) | 0.72  (0.56, 0.9) | 0.66  (0.53, 0.87) | 0.72  (0.56, 0.9) | 0.72  (0.58, 0.9) | 0.72  (0.55, 0.89) |

Ferritin was adjusted for alpha(1)-acid glycoprotein (AGP) by the BRINDA method.
